# Supplementary material for: NiCo-compounds inside and outside N-doped carbon nanotubes to construct a double-enhanced hierarchical structure for high energy density supercapacitors
Source: Royal Society of Chemistry journal article supplement (doi:10.1039/d3dt03049k), 2023-12-20
Supplement: d3dt03049k1.pdf [file d3dt03049k1.pdf]

# NiCo-compounds inside and outside N-doped carbon nanotubes to construct double-enhanced hierarchical structure for high energy density supercapacitor

Lansen Bi <sup>a</sup>, Qingbin Tian <sup>a</sup>, Lei Geng <sup>b</sup>, Yang Zhou <sup>a</sup>, Benyu Zheng <sup>a</sup>, Jiang-Shan

Gao <sup>a,\*</sup>, Yan He <sup>a,\*</sup>,

<sup>a</sup> College of Electromechanical Engineering, Qingdao University of Science and Technology, Shandong Engineering Laboratory for Preparation and Application of High-performance Carbon Materials, Qingdao 266061, China

<sup>b</sup> ShangDong Dazhan Nano Materials Co., Ltd, Binzhou 256220, China

Co-corresponding author: Jiang-Shan Gao Email: gaojs@qust.edu.cn

Yan He Email: heyan@qust.edu.cn

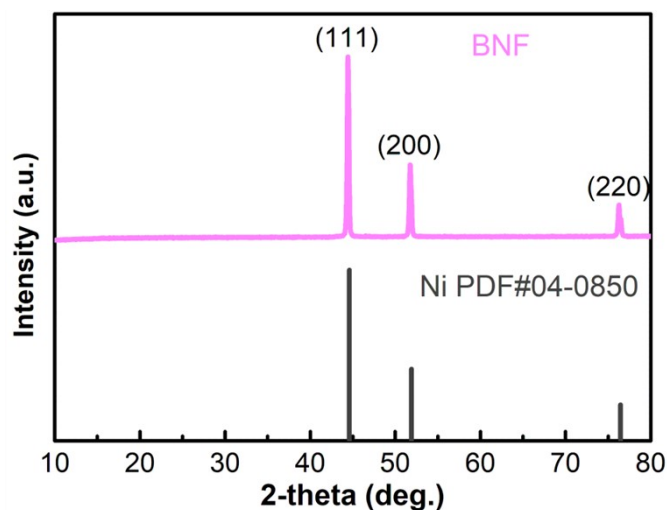

Fig. S1. XRD patterns of BNF

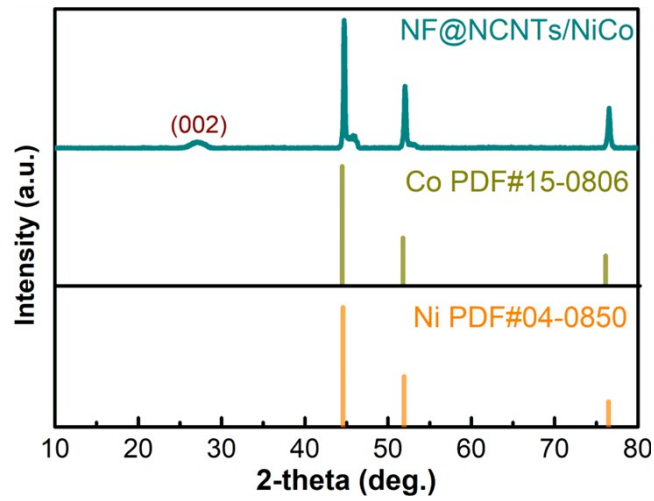

Fig. S2. XRD patterns of NF@NCNTs/NiCo

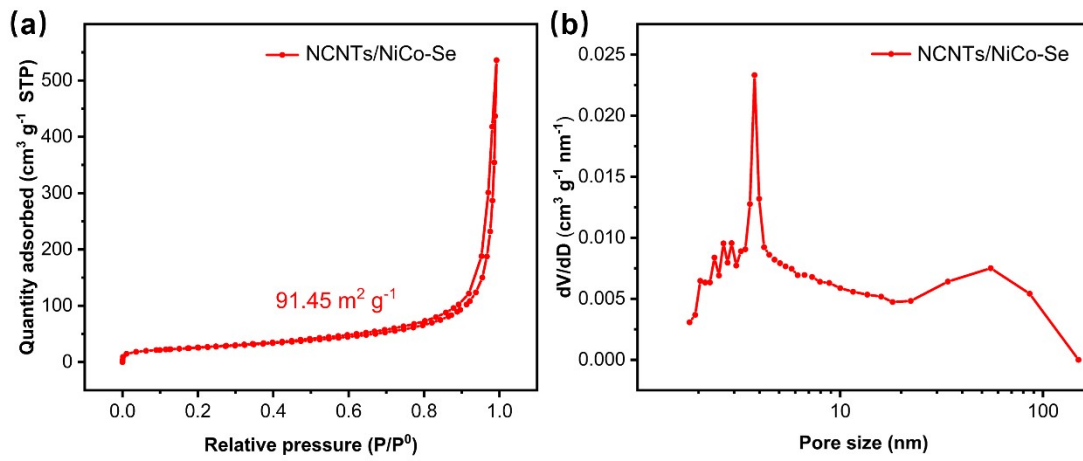

Fig. S3. a) N<sub>2</sub> adsorption-desorption isotherms and b) pore size distributions of the NCNTs/NiCo-Se

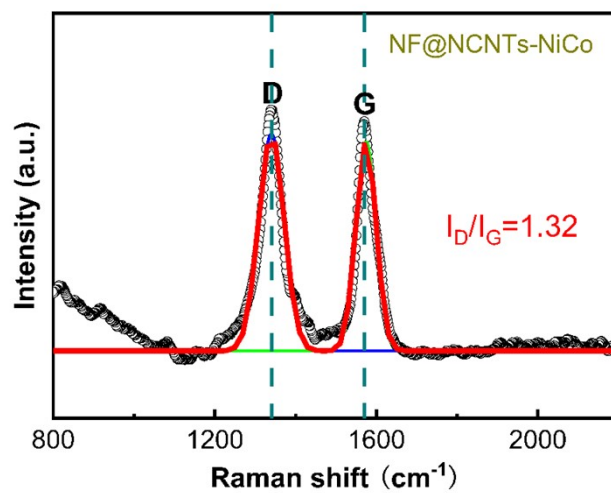

FigS4. Raman spectra of NF@NCNTs/NiCo

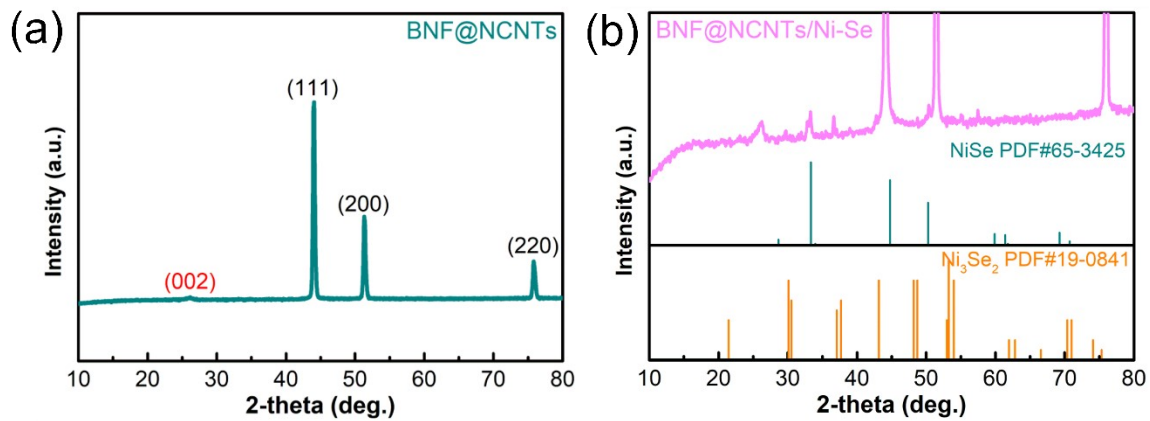

Fig. S5. XRD pattern of (a) BNF@NCNTs and (b) BNF@NCNTs/Ni-Se

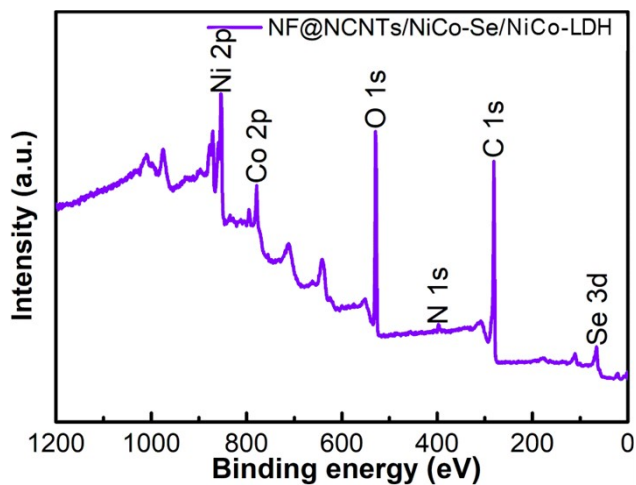

Fig. S6. XPS spectra of survey scan for NF@NCNTs/NiCo-Se/NiCo-LDH.

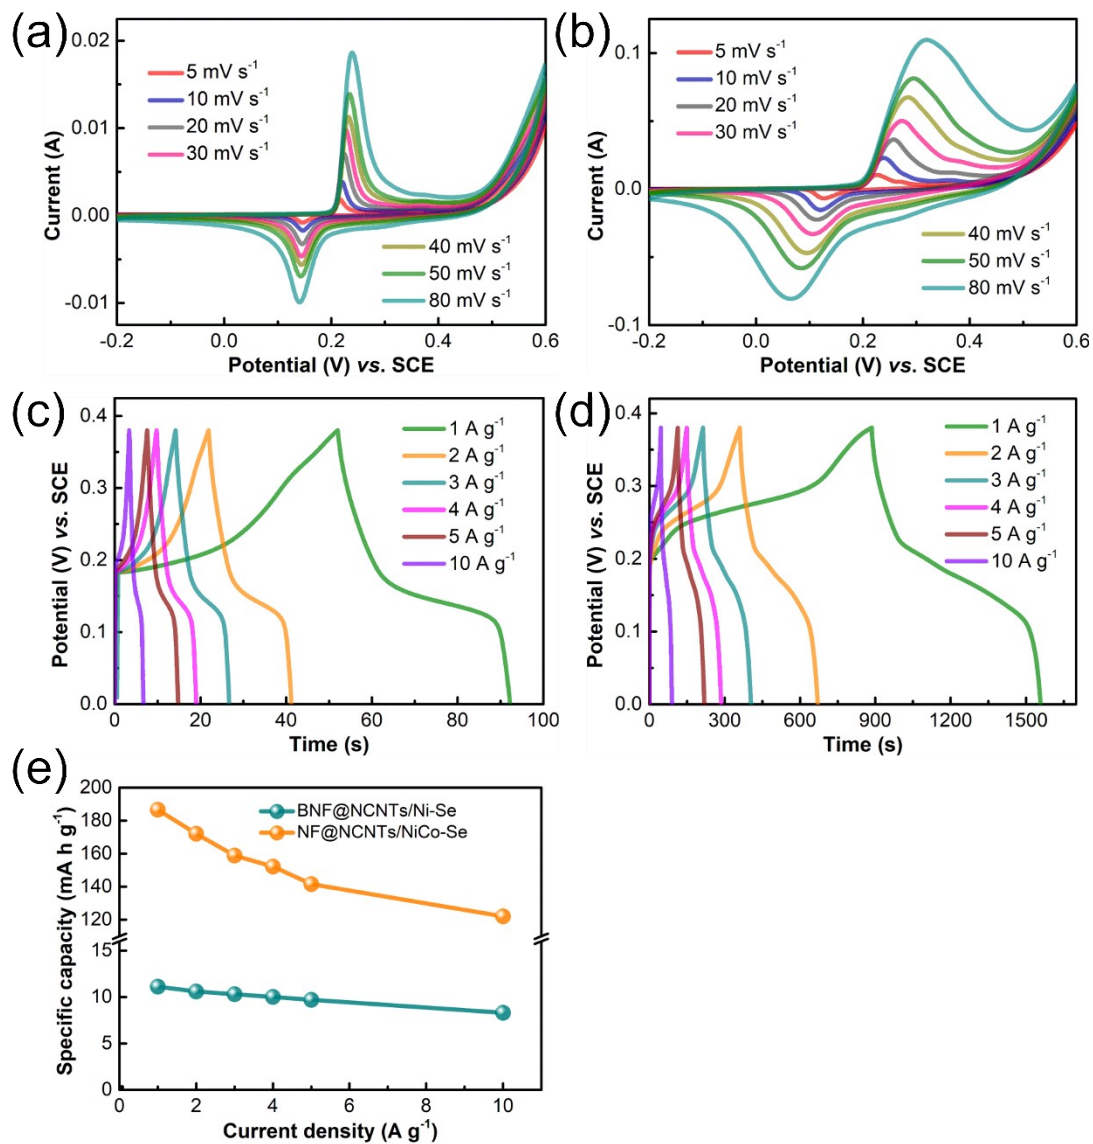

Fig. S7 (a, b) CV curves of BNF@NCNTs/Ni-Se and NF@NCNTs/NiCo-Se, respectively. (c, d) GCD curves of BNF@NCNTs/Ni-Se and NF@NCNTs/NiCo-Se at different current densities, respectively. (e) Specific capacity decay curve.
